# Supplementary material
Source: publisher site journal article supplement (https://zookeys.pensoft.net/article/22062/download/suppl/36/)
Supplement: Supplementary file

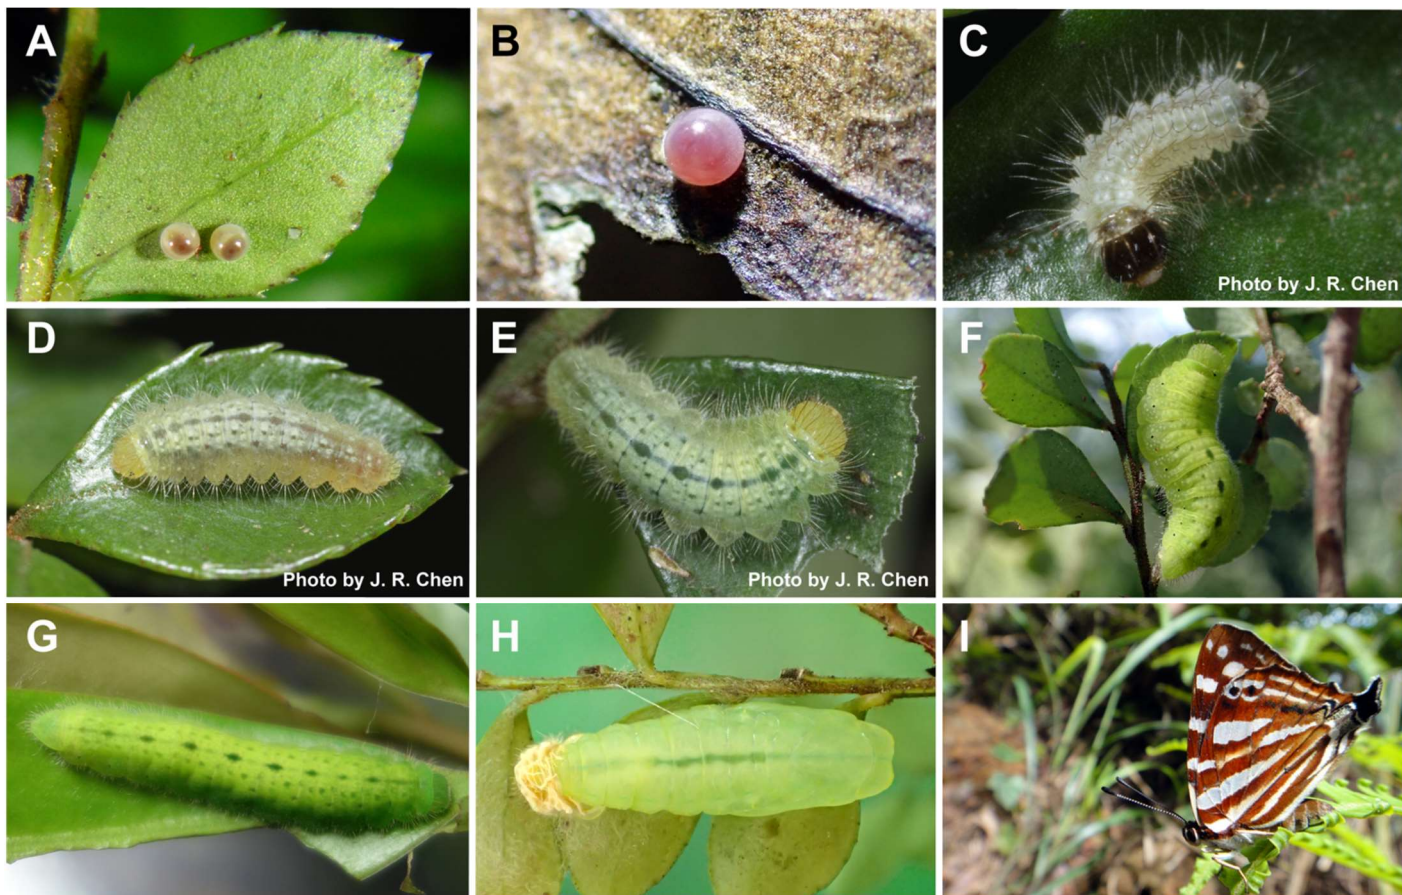

**Supplementary file 6. Life history of *Dodona formosana*.**

**A** eggs (laid on hostplant) **B** eggs (laid on materials closed to hostplant) **C** first instar larva **D** second instar larva **E** third instar larva **F** fourth instar larva **G** fifth instar larva **H** pupa **I** adult.
